# Supplementary material
Source: MDPI journal article supplement (https://www.mdpi.com/2072-4292/12/1/157)
Supplement: s1 [file s1]

## Supplementary Data

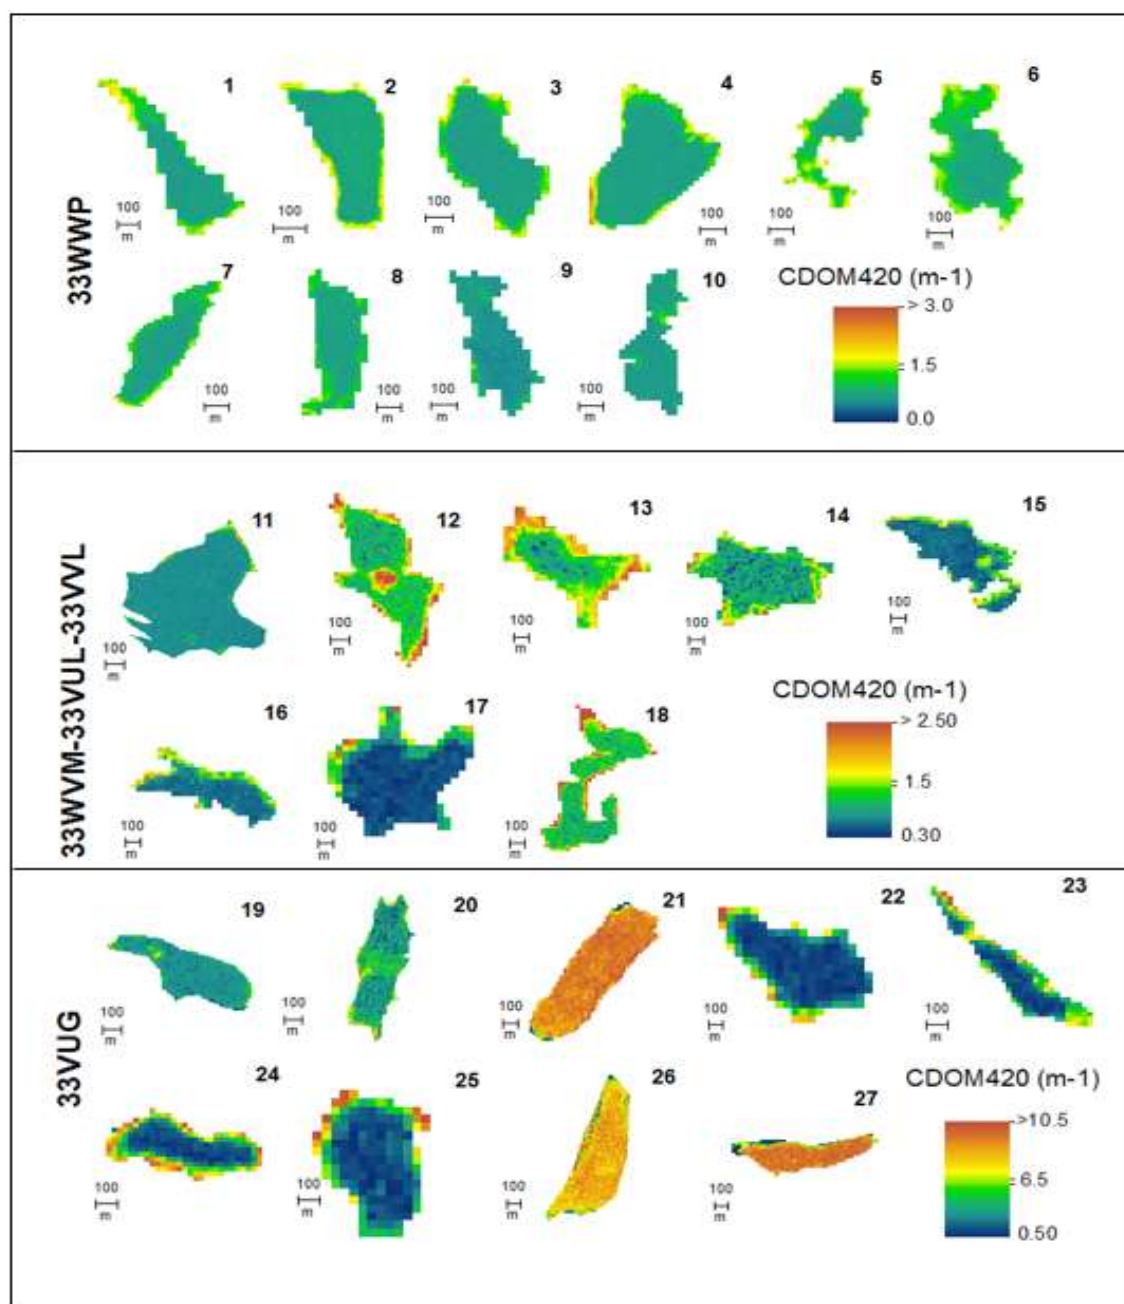

**Figure S1.** 46 lakes in five study regions in Sweden using Sentinel-2 images; Västerbotten W (33WWP) acquired on 21 July 2016, Jämtland (33WVM-33VUL-33VVL) acquired on 30 July 2016 and Värmland (33VUG) acquired on 4 June 2016.

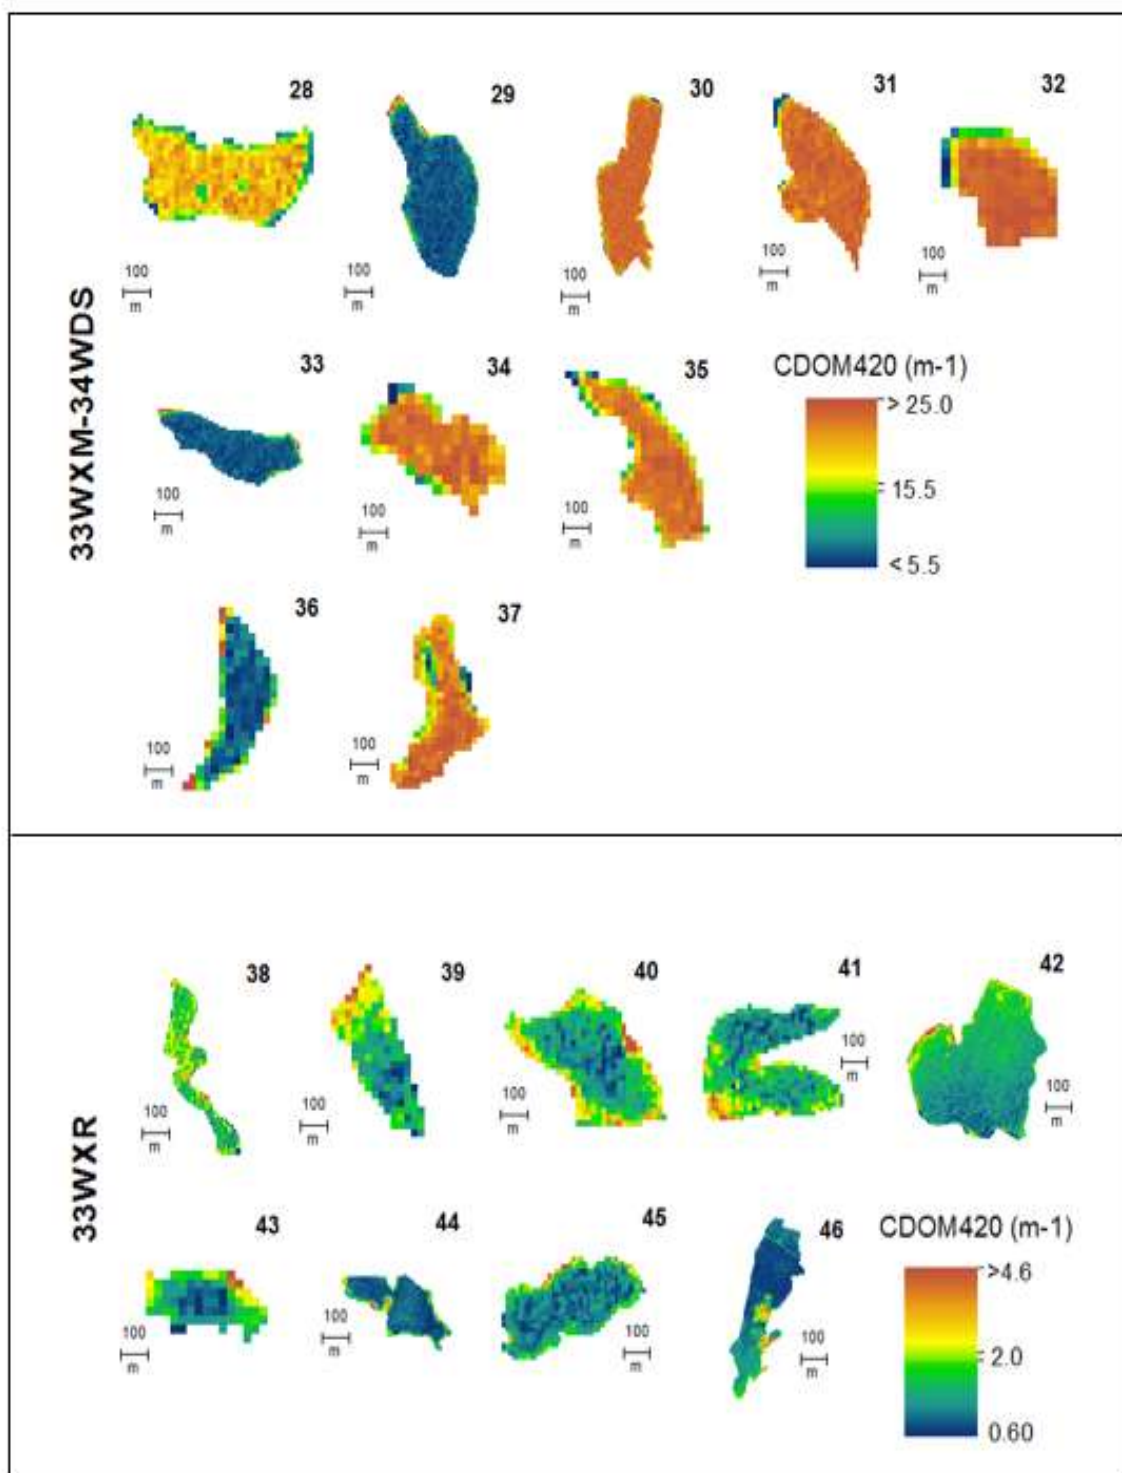

**Figure S2.** 46 lakes in five study regions in Sweden using Sentinel-2 images; Västerbotten E (33WXM-34WDS) acquired on 12 October 2016 and Norrbotten (33WXR) acquired on 30 July 2016.
